# Supplementary material
Source: publisher site journal article supplement (https://www.dovepress.com/article/292521)
Supplement: Supplementary file 1 [file get_supplementary_file.php]

**Supplementary Figures and Tables**

**Supplementary Figure 1**

**

1**

**Supplementary Figure 2**


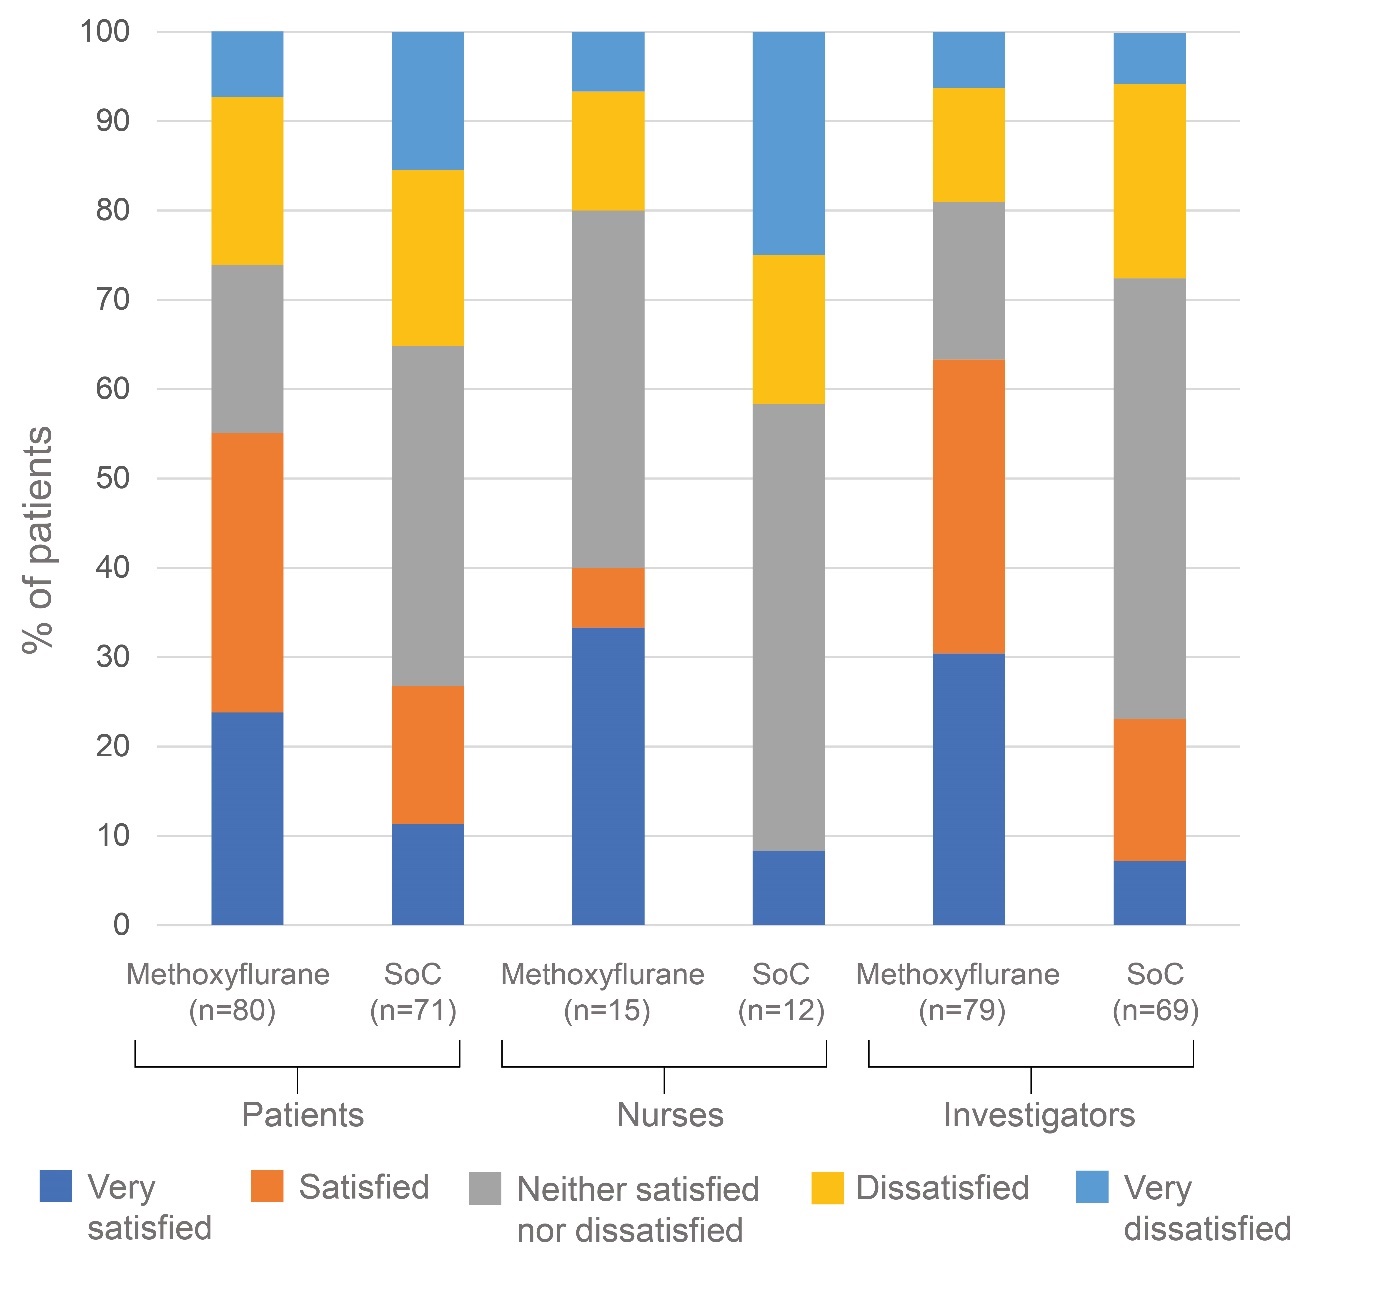


**Figure Legends**

**Supplementary Figure 1** Pain intensity difference (elderly population)
Abbreviations: CI, confidence interval; NSAIDs, non-steroidal anti-inflammatory drugs; SoC, standard of care; T5, 5 minutes after treatment initiation; T10, 10 minutes after treatment initiation, etc.

**Supplementary Figure 2** Treatment satisfaction (elderly population).
**Abbreviations:** SoC, standard of care.

**Supplementary Table 1 Patient disposition (elderly population)**

| **Population** | | **Methoxyflurane (N=85)** | **Standard of care ± placebo** | | | | | **Total (N=158)** |
| --- | --- | --- | --- | --- | --- | --- | --- | --- |
| **No treatment (N=17)** | **Paracetamol (N=17)** | **NSAID (N=20)** | **Opioid (N=19)** | **All (N=73)** |
| *MAP1* | |  |  |  |  |  |  |  |
| n | | 85 | 17 | 17 | 20 | 19 | 73 | 158 |
| Included, n (%) | | 82 (96.5%) | 16 (94.1%) | 17 (100%) | 20 (100%) | 19 (100%) | 72 (98.6%) | 154 (97.5%) |
| Excluded, n (%) | | 3 (3.5%) | 1 (5.9%) | 0 (0.0) | 0 (0.0) | 0 (0.0) | 1 (1.4%) | 4 (2.5%) |
|  | Received SoC within 1 min of inhaling methoxyflurane | 1 (33.3%) | 0 (0.0) | 0 (0.0) | 0 (0.0) | 0 (0.0) | 0 (0.0) | 29 (17.1) |
|  | VAS <30 at T0 | 2 (66.7%) | 1 (10.0) | 0 (0.0) | 0 (0.0) | 0 (0.0) | 1 (100.0) | 3 (75.0) |
| *Safety* | |  |  |  |  |  |  |  |
| n | | 84 | 17 | 17 | 20 | 19 | 73 | 157 |
| Included, n (%) | | 84 (100.0) | 17 (100.0) | 17 (100.0) | 20 (100.0) | 19 (100.0) | 73 (100.0) | 157 (100.0) |

**Abbreviations:** NSAID, non-steroidal anti-inflammatory drug; SoC, standard of care; T0, time of treatment initiation; VAS, visual analogue scale

**Supplementary Table 2 Patient demographics (elderly population)**

|  |  | **Methoxyflurane (N=82)** | **Standard of care ± placebo** | | | | | **Total (N=154)** |
| --- | --- | --- | --- | --- | --- | --- | --- | --- |
|  |  | **No treatment (N=16)** | **Paracetamol (N=17)** | **NSAID (N=20)** | **Opioid (N=19)** | **All (N=72)** |
| Age, years | |  |  |  |  |  |  |  |
|  | Mean (SD) | 73.8 (6.9) | 73.1 (6.0) | 76.0 (8.0) | 73.5 (6.0) | 77.8 (7.4) | 75.1 (7.0) | 74.4 (7.0) |
|  | Range | 65.9 - 96.3 | 65.0 - 84.0 | 65.2 - 95.2 | 66.0 - 86.0 | 66.4 - 95.1 | 65.0 - 95.2 | 65.0 - 96.3 |
| Sex, n (%) | |  |  |  |  |  |  |  |
|  | Female | 62 (75.6) | 6 (37.5) | 14 (82.4) | 11 (55.0) | 16 (84.2) | 47 (65.3) | 109 (70.8) |
|  | Male | 20 (24.4) | 10 (62.5) | 3 (17.6) | 9 (45.0) | 3 (15.8) | 25 (34.7) | 45 (29.2) |
| VAS score at randomization, mean (SD) | | 72.8 (16.6) | 67.8 (10.6) | 58.6 (16.1) | 69.3 (19.1) | 83.1 (11.9) | 70.1 (17.1) | 71.5 (16.9) |
| VAS score at T0, mean (SD) | | 74.2 (17.7) | 69.8 (16.3) | 68.5 (16.6) | 69.3 (19.1) | 84.7 (12.3) | 73.3 (17.4) | 73.8 (17.5) |
| Location of primary injury, n (%) | |  |  |  |  |  |  |  |
|  | n | 82 | 15 | 17 | 20 | 19 | 71 | 153 |
|  | Upper limb | 44 (53.7) | 10 (66.7) | 10 (58.8) | 7 (35.0) | 11 (57.9) | 38 (53.5) | 82 (53.6) |
|  | Lower limb | 26 (31.7) | 4 (26.7) | 6 (35.3) | 7 (35.0) | 7 (36.8) | 24 (33.8) | 50 (32.7) |
|  | Chest | 9 (11.0) | 0 (0.0) | 1 (5.9) | 4 (20.0) | 1 (5.3) | 6 (8.5) | 15 (9.8) |
|  | Face | 3 (3.7) | 1 (6.7) | 0 (0.0) | 2 (10.0) | 0 (0.0) | 3 (4.2) | 6 (3.9) |
| Type of primary injury, n (%) | |  |  |  |  |  |  |  |
|  | n | 82 | 16 | 17 | 20 | 19 | 72 | 154 |
|  | Fracture | 43 (52.4) | 9 (56.3) | 9 (52.9) | 6 (30.0) | 12 (63.2) | 36 (50.0) | 79 (51.3) |
|  | Contusion | 27 (32.9) | 3 (18.8) | 4 (23.5) | 9 (45.0) | 5 (26.3) | 21 (29.2) | 48 (31.2) |
|  | Dislocation | 6 (7.3) | 0 (0.0) | 3 (17.6) | 1 (5.0) | 2 (10.5) | 6 (8.3) | 12 (7.8) |
|  | Other | 3 (3.7) | 0 (0.0) | 1 (5.9) | 1 (5.0) | 0 (0.0) | 2 (2.8) | 5 (3.2) |
|  | Wound | 2 (2.4) | 2 (12.5) | 0 (0.0) | 1 (5.0) | 0 (0.0) | 3 (4.2) | 5 (3.2) |
|  | Sprain | 1 (1.2) | 1 (6.3) | 0 (0.0) | 2 (10.0) | 0 (0.0) | 3 (4.2) | 4 (2.6) |
|  | Burn | 0 (0.0) | 1 (6.3) | 0 (0.0) | 0 (0.0) | 0 (0.0) | 1 (1.4) | 1 (0.6) |

**Abbreviations:** NSAID, non-steroidal anti-inflammatory drug; SD, standard deviation; T0, time of treatment initiation; VAS, visual analogue scale

**Supplementary Table 3 Response criteria (elderly population): changes in pain intensity over time**

|  |  | **Methoxyflurane (N = 82)** | **Standard of care ± placebo** | | | | | | | | | |
| --- | --- | --- | --- | --- | --- | --- | --- | --- | --- | --- | --- | --- |
|  |  | **No treatment (N = 16)** | | **Paracetamol (N = 17)** | | **NSAID (N = 20)** | | **Opioid (N = 19)** | | **All (N = 72)** | |
| *Pain intensity  ≤30 mm, n (%)* | |  |  | P valuea |  | P valuea |  | P valuea |  | P valuea |  | P valuea |
|  | T5 | 9 (11.0) n=82 | 0 (0.0) n=16 | 0.0982 | 1 (5.9) n=17 | 0.5385 | 5 (25.0) n=20 | 0.1376 | 1 (5.3) n=19 | 0.6034 | 7 (9.7) n=72 | 0.8804 |
|  | T10 | 20 (25.0) n=80 | 3 (21.4) n=14 | 0.8858 | 4 (23.5) n=17 | 0.8020 | 6 (30.0) n=20 | 0.8539 | 1 (5.3) n=19 | 0.1473 | 14 (20.0) n=70 | 0.5068 |
|  | T15 | 28 (35.0) n=80 | 3 (13.3) n=15 | 0.0949 | 6 (35.3) n=17 | 0.6302 | 7 (35.0) n=20 | 0.5987 | 1 (5.3) n=19 | 0.0629 | 16 (22.5) n=71 | 0.1086 |
|  | T20 | 34 (42.5) n=80 | 3 (21.4) n=14 | 0.2053 | 6 (35.3) n=17 | 0.9151 | 9 (45.0) n=20 | 0.4537 | 2 (10.5) n=19 | 0.0545 | 20 (28.6) n=70 | 0.0893 |
|  | T30 | 46 (56.8) n=81 | 3 (18.8) n=16 | 0.0430 | 7 (43.8) n=16 | 0.4481 | 11 (55.0) n=20 | 0.3957 | 5 (35.7) n=14 | 0.1614 | 26 (39.4) n=66 | 0.0346 |
| *Relative reduction ≥30%, n (%)* | |  |  |  |  |  |  |  |  |  |  |  |
|  | T5 | 27 (32.9) n=82 | 1 (6.3) n=16 | 0.0982 | 3 (17.6) n=17 | 0.4146 | 6 (30.0) n=20 | 0.3336 | 1 (5.3) n=19 | 0.0611 | 11 (15.3) n=72 | 0.0162 |
|  | T10 | 46 (57.5) n=80 | 5 (35.7) n=14 | 0.1598 | 8 (47.1) n=17 | 0.5606 | 6 (30.0) n=20 | 0.0176 | 5 (26.3) n=19 | 0.0430 | 24 (34.3) n=71 | 0.0056 |
|  | T15 | 52 (65.0) n=80 | 6 (40.0) n=15 | 0.0952 | 10 (58.8) n=17 | 0.8423 | 9 (45.0) n=20 | 0.0423 | 5 (26.3) n=19 | 0.3248 | 34 (47.9) n=63 | 0.0367 |
|  | T20 | 56 (70.0) n=80 | 5 (35.7) n=14 | 0.0454 | 10 (58.8) n=17 | 0.6573 | 13 (65.0) n=20 | 0.8164 | 12 (63.2) n=19 | 0.9205 | 40 (57.1) n=66 | 0.1039 |
|  | T30 | 63 (77.8) n=81 | 5 (31.3) n=16 | 0.0021 | 12 (75.0) n=16 | 0.8168 | 15 (75.0) n=20 | 0.6567 | 11 (78.6) n=14 | 0.0988 | 43 (65.2) n=70 | 0.0812 |
| *Relative reduction ≥50%, n (%)* | |  |  |  |  |  |  |  |  |  |  |  |
|  | T5 | 24 (41.4) n=66 | 1 (6.3) n=15 | 0.0982 | 1 (6.7) n=15 | 0.7747 | 1 (6.7) n=15 | 0.1298 | 0 (0.0) n=18 | 0.0611 | 2 (3.2) n=63 | 0.0303 |
|  | T10 | 31 (52.5) n=59 | 5 (35.7) n=11 | 0.2669 | 4 (30.8) n=13 | 0.9281 | 4 (22.2) n=18 | 0.0286 | 1 (6.7) n=15 | 0.0693 | 11 (19.3) n=57 | 0.0140 |
|  | T15 | 31 (52.5) n=59 | 6 (40.0) n=11 | 0.0668 | 7 (50.0) n=14 | 0.6756 | 8 (42.1) n=19 | 0.0970 | 3 (23.1) n=13 | 0.1778 | 20 (35.1) n=57 | 0.0598 |
|  | T20 | 40 (62.5) n=64 | 5 (35.7) n=12 | 0.0779 | 7 (50.0) n=14 | 0.7000 | 10 (58.8) n=17 | 0.1806 | 8 (53.3) n=15 | 0.8621 | 28 (48.3) n=58 | 0.1210 |
|  | T30 | 49 (73.1) n=67 | 4 (26.7) n=15 | 0.0072 | 10 (71.4) n=14 | 0.9296 | 12 (70.6) n=17 | 0.6302 | 10 (76.9) n=13 | 0.8048 | 36 (61.0) n=59 | 0.1400 |

**Note:** aP value vs methoxyflurane.

**Abbreviations:** T5, 5 minutes after treatment initiation; T10, 10 minutes after treatment initiation, etc.

**Supplementary Table 4 Time to pain relief (elderly population)**

|  |  | **Methoxyflurane (N=82)** | **Standard of care ± placebo** | | | | |
| --- | --- | --- | --- | --- | --- | --- | --- |
|  |  | **No treatment (N=16)** | **Paracetamol (N=17)** | **NSAID (N=20)** | **Opioid (N=19)** | **All (N=72)** |
| *Patient-declared time to pain relief* | |  |  |  |  |  |  |
|  | Median (95% CI), mins | 9 (6, 11) | NE (11, NE) | 13 (9, NE) | 12 (5, 14) | 12 (10, 15) | 13 (11, 15) |
|  | HR (95% CI) vs methoxyflurane | - | 0.49 (0.21, 1.12) | 0.76 (0.40, 1.46) | 0.49 (0.28, 0.86) | 0.76 (0.43, 1.33) | 1.64 (1.13, 2.38) |
|  | P value | - | 0.0901 | 0.4145 | 0.0137 | 0.3370 | 0.0087 |
| *Time to ≥30% reduction in pain* | |  |  |  |  |  |  |
|  | Median (95% CI), mins | 10 (10, 15) | NE (10, NE) | 13 (9, 30) | 20 (5, 30) | 15 (12, 29) | 20 (15, 24) |
|  | HR (95% CI) vs methoxyflurane | - | 0.29 (0.12, 0.67) | 0.89 (0.49, 1.64) | 0.67 (0.38, 1.18) | 0.75 (0.42, 1.34) | 1.59 (1.10, 2.29) |
|  | P value | - | 0.0041 | 0.7184 | 0.1650 | 0.3256 | 0.0132 |

**Abbreviations:** CI, confidence interval; HR, hazard ratio; NE, not evaluable; NSAID, non-steroidal anti-inflammatory drug
